# Supplementary material for: Exosomes Derived from Human Primed Mesenchymal Stem Cells Induce Mitosis and Potentiate Growth Factor Secretion
Source: PubMed Central journal article supplement (PMC6441283; doi:10.1089/scd.2018.0200), 2019-03-08
Supplement: Supp_Fig1.pdf [file Supp_Fig1.pdf]

## Supplementary Data

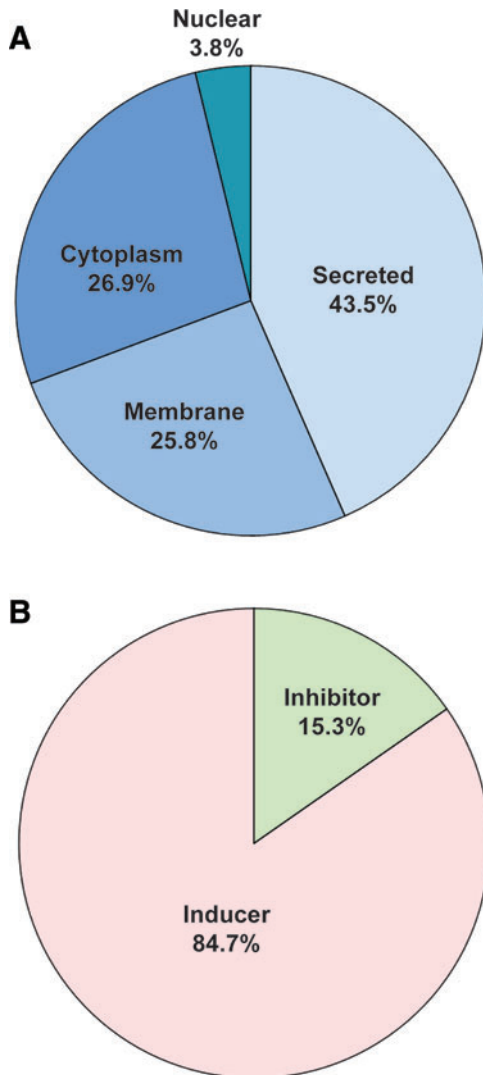

**SUPPLEMENTARY FIG. S1.** pMEX proliferation-associated proteins enriched for secretory proteins. **(A)** HiRIEF LC-MS/MS proteomic analysis followed by IPA analysis determined that the most relatively abundant sub-cellular classification of pMEX proteins was secretory in nature. **(B)** IPA analysis showing relative abundance distribution of pMEX proteins known to be inducers vs inhibitors of proliferation,  $n=3$ , FDR1%. IPA, Ingenuity Pathway Analysis; pMEX, primed mesenchymal stem cells secrete exosomes.
