# Supplementary material for: Exosomes Derived from Human Primed Mesenchymal Stem Cells Induce Mitosis and Potentiate Growth Factor Secretion
Source: PubMed Central journal article supplement (PMC6441283; doi:10.1089/scd.2018.0200), 2019-03-08
Supplement: Supp_Fig2.pdf [file Supp_Fig2.pdf]

|         |               |
|---------|---------------|
| AR      | IGFBP-4       |
| BDNF    | IGFBP-6       |
| bFGF    | IGF-I         |
| BMP-4   | Insulin       |
| BMP-5   | MCSF R        |
| BMP-7   | NGF R         |
| b-NGF   | NT-3          |
| EGF     | NT-4          |
| EGF R   | OPG           |
| EG-VEGF | PDGF-AA       |
| FGF-4   | PIGF          |
| FGF-7   | SCF           |
| GDF-15  | SCF R         |
| GDNF    | TGF $\alpha$  |
| GH      | TGF $\beta$ 1 |
| HB-EGF  | TGF $\beta$ 3 |
| HGF     | VEGF          |
| IGFBP-1 | VEGF R2       |
| IGFBP-2 | VEGF R3       |
| IGFBP-3 | VEGF-D        |

**SUPPLEMENTARY FIG. S2** Complete list of proteins assessed via Quantibody multiplexed sandwich ELISA array. *Grayed boxes* were not detected in the samples tested.
